# 1 **Statistical modeling of chikungunya virus intra-vector infection dynamics in a French *Aedes*** 2 ***albopictus* population reveals an explosive epidemic potential**

3  
4 Barbara Viginier<sup>1</sup>, Céline Garnier<sup>1</sup>, Lucie Cappuccio<sup>1</sup>, Edwige Martin<sup>2</sup>, Claire Valiente Moro<sup>2</sup>, Albin Fontaine<sup>3,4,5</sup>, Sébastien  
5 Lequime<sup>6</sup>, Frédérick Arnaud<sup>1</sup>, Maxime Ratinier<sup>1</sup>, Vincent Raquin<sup>1</sup>  
6

7 <sup>1</sup> École Pratique des Hautes Études (EPHE), Institut National de la Recherche Agronomique (INRA), Université de Lyon,  
8 Université Claude Bernard Lyon1, UMR 754, Infections Virales et Pathologie Comparée (IVPC), Paris Sciences Lettres (PSL)  
9 Research University, F-69007, Lyon, France.

10 <sup>2</sup> Univ Lyon, Université Claude Bernard Lyon 1, CNRS, INRAE, VetAgro Sup, UMR Ecologie Microbienne, F-69622  
11 Villeurbanne, France.

12 <sup>3</sup> Unité Parasitologie et Entomologie, Département Microbiologie et maladies infectieuses, Institut de Recherche Biomédicale  
13 des Armées (IRBA), Marseille, France.

14 <sup>4</sup> Aix Marseille Univ, IRD, SSA, AP-HM, UMR Vecteurs–Infections Tropicales et Méditerranéennes (VITROME), Marseille,  
15 France.

16 <sup>5</sup> IHU Méditerranée Infection, Marseille, France.

17 <sup>6</sup> Cluster of Microbial Ecology, Groningen Institute for Evolutionary Life Sciences, University of Groningen, Groningen, The  
18 Netherlands.

19  
20 **Keywords** : Arbovirus ; vector ; mosquito ; *Aedes albopictus* ; chikungunya virus ; epidemiology ;  
21 vector competence

## 22 **Abstract**

23  
24 Arbovirus emergence and epidemic potential, as approximated by the vectorial capacity formula,  
25 depends on several host and vector parameters including vector intrinsic ability to transmit the pathogen.  
26 Such ability, called vector competence is influenced by biotic (e.g. virus and vector genotype) and abiotic  
27 (e.g. temperature). Vector competence is often evaluated as a qualitative phenotype although it is a  
28 multistep, time-dependent, quantitative phenotype. Combination of experimental and modelling  
29 approaches can i) capture intra-vector dynamics of arboviral infection and ii) use data to estimate  
30 arbovirus epidemic potential. Here, we measured individual *Aedes albopictus* (Lyon, France)  
31 mosquitoes infection, dissemination, and transmission rate upon oral exposure to chikungunya virus  
32 (CHIKV, La Reunion Island isolate) at eleven time-points from day 2 to day 20 post-exposure (dpe) for  
33 a range of CHIKV infectious doses spanning human viremia. Statistical modelisation indicates an  
34 explosive CHIKV intra-vector dynamics mainly due to an absence of dissemination barrier with 100% of  
35 the infected mosquitoes ultimately exhibiting a disseminated infection regardless of the viral dose.  
36 Transmission rate data revealed a time and dose-dependent but overall weak transmission barrier with  
37 individuals transmitting as soon as 2 dpe and >50% infectious mosquitoes at 6 dpe for the highest dose.  
38 Epidemiological simulations conducted with an Agent-Based Model based on experimental intra-vector  
39 dynamics data showed that even at low mosquito biting rates, CHIKV triggers explosive outbreaks.  
40 Together, this reveals the high epidemic potential of this CHIKV isolate with this French metropolitan  
41 population of *Aedes albopictus*.  
42

## 43 Introduction

44 Arthropod-borne viruses (arboviruses) are viruses transmitted to vertebrate hosts by blood-  
45 sucking arthropods. Dengue virus (DENV), yellow fever virus (YFV), Zika virus (ZIKV) and chikungunya  
46 virus (CHIKV) are mosquito-borne viruses of major public health importance, causing hundreds of  
47 millions of human infections each year worldwide associated with serious morbidity and mortality  
48 (Labeaud, Bashir & King, 2011; Bhatt et al., 2013). These viruses are primarily transmitted to humans  
49 by *Aedes aegypti* mosquitoes, although *Aedes albopictus* is often incriminated as a vector. These two  
50 vector species expand their native range to spread worldwide, putting half of the world's population at  
51 risk of arbovirus transmission (Kraemer et al., 2019). Globalization and urbanization are two identified  
52 factors that promote arbovirus emergence by gathering hosts, pathogens and vectors together (Gubler,  
53 2011; Grubaugh et al., 2019). Arbovirus spread is a multi-factorial, dynamic process that can be  
54 estimated using the vectorial capacity (Vcap) model, that aims to determine the average number of  
55 infectious vector bites that arise per day from one infected host in a susceptible human population (Smith  
56 et al., 2012). The vector-centric component of VCap integrates mosquito ecological (density per host,  
57 survival) and behavioural (daily biting rate per human) factors along with mosquito-arbovirus interaction  
58 factors, namely vector competence (VComp) and extrinsic incubation period (EIP). VComp represents  
59 the ability of a mosquito, following an infectious blood meal, to develop midgut infection, disseminate  
60 the virus beyond the midgut barrier and subsequently retransmit the virus through the saliva during the  
61 next bite. According to the literature, VComp is impacted by biotic (mosquito genotype, virus genotype,  
62 virus dose...) and abiotic (temperature, ...) factors (Viglietta et al., 2021). VComp is often expressed as  
63 qualitative phenotype based on the proportion of infected, disseminated or, less frequently infectious  
64 mosquitoes at limited number (~1 to 3) of discrete time points. However, the dynamics of vector  
65 competence heterogeneity remains often masked, requiring modeling tools unveil it (Christofferson &  
66 Mores, 2011). Arbovirus transmission dynamics is shaped by the distribution of EIPs, the time required  
67 for the vector to become infectious. Such distribution can be implemented into epidemiological  
68 simulations together with other vectorial capacity estimates in order to capture arbovirus epidemic  
69 potential. Recently, ZIKV intra-vector dynamics was modelled highlighting its low epidemic potential in  
70 *Aedes albopictus* (Lequime et al., 2020b).

71 The Asian tiger mosquito, *Ae. albopictus*, is an invasive species that spread worldwide, its  
72 current distribution being likely to increase during the next 30 years partly due to urbanization and  
73 climate change (Kraemer et al., 2019). Arbovirus detection in field-collected specimens coupled to  
74 vector competence laboratory experiments support the permissiveness of the Asian tiger mosquito to  
75 numerous arboviruses (Gratz, 2004; Paupy et al., 2009). *Ae. albopictus* is an anthropophilic species  
76 (Fikrig & Harrington, 2021), with a trend to take several consecutive blood meals (Delatte et al., 2010)  
77 thereby increasing risk of pathogen transmission (Armstrong et al., 2019). Therefore, *Ae. albopictus*  
78 must be considered an important arbovirus notably in Europe, where it was designated as the primary  
79 vector during autochthonous circulation of DENV and CHIKV in Italy (Rezza et al., 2007; Venturi et al.,  
80 2017), Spain (Aranda et al., 2018) and mainland France (Delisle et al., 2015; Succo et al., 2016). As  
81 demonstrated for *Ae. aegypti* and DENV (Lambrechts, 2011), *Ae. albopictus* vector competence for  
82 CHIKV depends on the complex interaction between mosquito genotype, virus genotype and

83 environmental conditions (Zouache et al., 2014). The CHIKV 06.21 genotype (East-Central-South  
84 African lineage) from La Réunion outbreak in 2006 (Schuffenecker et al., 2006) is considered highly  
85 infectious for *Ae. albopictus* in several mosquito populations (Vazeille et al., 2007; Sanchez-Vargas et  
86 al., 2019). This isolate was found in mosquito saliva as soon as 2 days post exposure to an infectious  
87 blood meal (Dubrulle et al., 2009), in line with the presence of an A226V mutation in the viral E1 envelop  
88 gene that promotes virus dissemination in *Ae. albopictus* (Tsetsarkin et al., 2007). However,  
89 simultaneous testing of multiple *Ae. albopictus* populations for CHIKV 06.21 within a single vector  
90 competence assay underlined population-specific transmission (Vega-Rua et al., 2013, 2014). Several  
91 introductions events occurred leading to genetically diverse populations (Sherpa et al., 2019). A French  
92 *Ae. albopictus* population (Bar-sur-Loup, Alpes-Maritimes) was experimentally shown to transmit CHIKV  
93 06.21 (Vega-Rua et al., 2013) and CHIKV isolates carrying the A226V mutation were identified in  
94 autochthonous human cases in France (Delisle et al., 2015; Calba et al., 2017), underlying a local  
95 emergence potential. Few studies explored the impact of intra-vector viral dynamics on arbovirus  
96 transmission although prior modelisation of CHIKV EIP found, based on literature data, that the 1-3 days  
97 average EIP was substantially overestimated for CHIKV 06.21-*Ae. albopictus* pair, this value being more  
98 ~8 days at the earliest (Christofferson et al., 2014). This gap might be at least partly explained by the  
99 virus dose, as it positively correlates with *Ae. albopictus* infection rate for CHIKV (Hurk et al., 2010) and  
100 could impact dissemination or transmission dynamics. In this context, measuring CHIKV intra-vector  
101 dynamics in *Ae. albopictus* upon a range of virus doses and how it influence CHIKV epidemic potential  
102 would help to better understand, anticipate and prevent disease emergence.

103 Here, we modelled the intra-vector dynamics of CHIKV 06.21 in a field-derived population of  
104 *Ae. albopictus* from France (Lyon city) according to human viremia related virus doses in the blood meal.  
105 After estimating CHIKV viremia range in human blood based on literature data, we exposed *Ae.*  
106 *albopictus* mosquitoes to various doses representative of viral load in human blood. Individual  
107 mosquitoes were analysed from day 2 to day 20 post-exposure to CHIKV to determine infection,  
108 dissemination and transmission rates. This allowed us to model a dose-dependent intra-vector  
109 dynamics, to estimate the strength of vector infection, dissemination and transmission barriers and to  
110 access to the distribution of EIP according to the virus dose in the blood meal. These data were  
111 implemented in the agent-based model Nosoi (Lequime et al., 2020a) to estimate, using realistic  
112 vectorial capacity parameters, the epidemic potential of CHIKV in a French population of *Ae. albopictus*.

113

## 114 **Materials and methods**

115

### 116 **Modeling chikungunya viremia in human**

117 CHIKV RNA load in human blood along the course of infection in symptomatic patients were  
118 recovered from two studies. The first study monitored blood CHIKV viremia from a retrospective cohort  
119 of 102 febrile patients in Bandung, West Java, Indonesia between 2005 and 2009 (Riswari et al., 2015).  
120 The second study assessed CHIKV RNA viremic profile from 36 sera from day 1 to day 7 of illness  
121 during a CHIKV epidemic in 2009 in Thepa and Chana districts of Songkhla province, Thailand  
122 (Appassakij et al., 2013). For the second study, the blood CHIKV RNA load from individual patients was

123 not available therefore the median value was used. The viremia quantity data from RT-PCR was  
124 expressed on the logarithmic scale to the base 10 before the model fitting. The Wood's gamma-type  
125 function was used to model the viremia dynamic. The function is given in equation:

$$126 \quad y(t) = at^b e^{-ct}$$

127 where  $y(t)$  represents the level of viremia in the blood at  $t$  days post infection, with  $a$ ,  $b$  and  $c$  representing  
128 constants linked to the viremia dynamic (Islam et al., 2013). Viremia data were originally expressed in  
129 time pre- or post- symptom onset while the model represent viremia as a function of time post infection.  
130 A fixed arbitrary median intrinsic incubation period of 6 days was added to each viremia time to  
131 standardize the time scale between the data and the model. This fixed incubation period falls into the  
132 estimated 2-10 days incubation range (Moloney et al., 2014) and was chosen to ensure that all observed  
133 viremia data occurred after infection. The model was fitted to the data using non-linear least-squares  
134 regression implemented in the *nls* function in the R environment (<https://www.R-project.org/>). Using this  
135 method, a possible intra-human CHIKV viremia dynamic with 95% confidence intervals was proposed.  
136

### 137 **Chikungunya virus production and titration**

138 The chikungunya virus (CHIKV) strain 06.21 from Indian Ocean lineage was isolated from a  
139 new-born serum sample with neonatal encephalopathy in La Réunion island, in 2005 (Schuffenecker et  
140 al., 2006). This highly passaged strain was amplified in *Aedes albopictus* cell line C6/36 as described  
141 (Raquin et al., 2015). CHIKV was inoculated at a multiplicity of infection of 0.01 on C6/36 cells in  
142 Leibovitz's L-15 media (Gibco) with 10% (vol:vol) 1X Tryptose Phosphate Broth (Gibco), 10% (vol:vol)  
143 foetal bovine serum and 0.1% (vol:vol) 10,000 Units/mL penicillin/streptomycin (Gibco). Cells were  
144 incubated for 3 days at 28°C before the supernatant was clarified by centrifugation for 5 min at 500 G  
145 and stored at -80°C as aliquots. CHIKV infectious titer was measured on C6/36 cells using fluorescent  
146 focus assay (Raquin et al., 2015). Briefly,  $3 \times 10^5$  cells/well were inoculated in 96-well plates with 40  
147  $\mu\text{L}$ /well of viral inoculum after culture media removal and incubated for 1 h at 28°C. 150  $\mu\text{L}$ /well of a mix  
148 1:1 L-15 media and 3.2% medium viscosity carboxymethyl cellulose (Sigma) were added as an overlay  
149 prior to incubate the cells for 3 days at 28°C. After incubation, cells were fixed in 100  $\mu\text{L}$ /well of 4%  
150 paraformaldehyde for 20 min then rinsed 3 times in 100  $\mu\text{L}$ /well of 1X Dulbecco's phosphate buffered  
151 saline (DPBS) (Gibco) prior to immune labelling. Cells were permeabilized for 30 min in 50  $\mu\text{L}$ /well of  
152 0.3% (vol:vol) Triton X-100 (Sigma) in 1X DPBS + 1% Bovine Serum Albumin (BSA, Sigma) at room  
153 temperature then rinsed 3 times in 100  $\mu\text{L}$ /well of 1X DPBS. A Semliki Forest virus anticapsid antibody  
154 diluted 1:600 in 1X DPBS + 1% Bovine Serum Albumin (BSA, Sigma) was used as a primary antibody.  
155 Cells were incubated in 40  $\mu\text{L}$ /well of primary antibody for 1 h at 37°C, rinsed 3 times in 100  $\mu\text{L}$ /well of  
156 1X DPBS then incubated in 40  $\mu\text{L}$ /well of anti-mouse Alexa488 secondary antibody (Life Technologies)  
157 at 1:500 in 1X DPBS + 1% BSA for 30 min at 37°C. Cells were rinsed 3 times in 100  $\mu\text{L}$ /well 1X DPBS  
158 then once in 100  $\mu\text{L}$ /well tap water, stored at 4°C overnight prior to plate reading under Zeiss Colibri 7  
159 fluorescence microscope at 10X objective. Plates were stored at 4°C protected from light. Infectious titer  
160 of the CHIVK 06.21 stock was  $4.25 \times 10^8$  fluorescent focus unit (FFU) per mL.

161  
162 **Mosquito colony**

163 A French population of *Aedes (Stegomyia) albopictus* (Skuse, 1895) was used in this study.  
164 Mosquito larvae were collected in 2018 in breeding sites from three different sites around Lyon (Rhône,  
165 France). The population was maintained and amplified under standard laboratory conditions (28°C, 80%  
166 relative humidity, 16:8 hours light:dark cycle) using mice feeding for 10 generations (F<sub>10</sub>) prior to  
167 experiments. Eggs were hatched for 1 h in dechlorinated tap water and larvae were reared at 26°C (16:8  
168 h light:dark cycle) at a density of 200 larvae in 23 x 34 x 7 cm plastic trays (Gilac) in 1.5 L of dechlorinated  
169 tap water supplemented with 0.1 g of a 3:1 (TetraMin tropical fish food:Biover yeast) powder every two  
170 days. Adults were maintained in 32.5 x 32.5 x 32.5 cm cages (Bugdorm) at 28°C, 80% relative humidity,  
171 16:8 h light:dark cycle with permanent access to 10% sugar solution.

172

### 173 **Experimental mosquito exposure to CHIKV**

174 Four to 8-day old females were confined in 136 x 81 mm plastic feeding boxes (Corning-  
175 Gosselin) with ~60 females per box. Females were transferred in the level 3 biosafety facility (SFR  
176 AniRA, Lyon Gerland) at 26°C, 12:12 h light:dark cycle with no access to sugar solution 16 h before the  
177 infectious blood meal. The blood meal was composed of a 2:1 (vol:vol) mixture of washed human  
178 erythrocytes (multiple anonymous donors, EFS AURA, CODECOH DC-2019-3507) and viral  
179 suspension supplemented with 2% (vol:vol) of 0.5 M ATP, pH 7 in water (Sigma). Feeders (Hemotek)  
180 were covered with pig small intestine and filled with 3 mL of infectious blood mixture. Females were  
181 allowed to feed for 1h at 26°C and blood aliquots were taken before (T0) and after (1h) the feeding and  
182 stored at -80°C for further titration (Figure S1). Mosquitoes were anesthetized on ice and fully engorged  
183 females were transferred in 1-pint cardboard containers (10-25 females/container) and maintained with  
184 10% sucrose. Cardboard containers were placed in 18 x 18 x 18 inches cages (BioQuip) and kept in  
185 climatic chambers at 26°C, 70% humidity.

186

### 187 **Mosquito collection and CHIKV detection**

188 Individual mosquitoes were harvested between day 2 and day 20 post-exposure (dpe) to CHIKV. Saliva  
189 was collected first then head and bodies were recovered. Prior to saliva collection, mosquitoes were  
190 anesthetized on ice then legs and wings were removed under a stereomicroscope. Individuals were  
191 placed on plastic plate maintained by double-sided adhesive tape. The proboscis was inserted in a  
192 trimmed 10 µL filtered tip containing 10 µL of foetal bovine serum hold above the mosquito by modeling  
193 clay (Heitmann et al., 2018). Two µL of 1% pilocarpine hydrochloride (Sigma) supplemented with 0.1%  
194 Tween-20 (Sigma) in water were added on the thorax of each mosquito to promote salivation.  
195 Mosquitoes were allowed to salivate at 26°C, 80% relative humidity for 1 h. The foetal bovine serum  
196 containing the saliva was expelled in an ice-cold tube filled with 150 µL of DMEM media (Gibco)  
197 supplemented with antibiotics solution (Amphotericin B 2.5µg/ml, Nystatin 1/100, Gentamicin 50µg/ml,  
198 Penicillin 5U/ml and Streptomycin 5µg/ml (Gibco)). Following salivation, the head and the body of each  
199 mosquito were separated using a pin holder with a 0.15 mm minutien pins (FST). Heads and bodies  
200 were transferred in separate, individual grinding tubes containing 500 µL of DMEM supplemented with  
201 antibiotics (see above) and one 3-mm diameter tungsten bead (Qiagen). Samples were grinded on a  
202 96-well adapter set for 2 x 1 min, 30 Hz using a TissueLyser (Qiagen) then stored at -80°C. CHIKV



203 detection was performed once on 40 to 50  $\mu$ L of undiluted (raw) saliva, head and body sample using  
204 fluorescent focus assay (see above). Each mosquito sample was declared positive or negative for  
205 CHIKV in presence or absence of fluorescent signal, respectively. CHIKV prevalence was calculated as  
206 the proportion (in %) of mosquito samples (body, head or saliva) positive for virus signal. Each 96-well  
207 plate harboured positive (CHIKV viral stock) and negative (raw grinding media) controls. No signal was  
208 detected in negative controls and positive control wells were fully positive for CHIKV signal. Each plate  
209 was examined by two independent persons. Of note, saliva samples were deposited immediately (no  
210 freezing) on C6/36 cells in order to maximise CHIKV detection notably in samples with low viral load. 30  
211  $\mu$ L of saliva sample were immediately mixed with 70  $\mu$ L of TRIzol (Life Technologies) and stored at -  
212 80°C prior to RNA isolation. The rest of the samples was stored at -80°C as a back-up.

213

#### 214 **RNA isolation from saliva**

215 Total RNA was isolated from 30  $\mu$ L of saliva sample mixed with 70  $\mu$ L TRIzol and stored at -  
216 80°C as described (Raquin et al., 2017). After thawing samples on ice, 20  $\mu$ L of chloroform (Sigma)  
217 were added. The tubes were mixed vigorously, incubated at 4°C for 5 min and centrifuged at 17,000 G  
218 for 15 min, 4°C. The upper phase was transferred in a new tube containing 60  $\mu$ L isopropanol  
219 supplemented with 1  $\mu$ L GlycoBlue (Life Technologies). Samples were mixed vigorously and stored at -  
220 80°C overnight to allow RNA precipitation. After 15 min at 17,000 G, 4°C the supernatant was discarded  
221 and the blue pellet was rinsed with 500  $\mu$ L ice-cold 70% ethanol in water. The samples were centrifuged  
222 at 17,000 G for 15 min, 4°C, the supernatant was discarded and the RNA pellet was allowed to dry for  
223 10 min at room temperature. Ten  $\mu$ L of RNase-free water (Gibco) were added and samples were  
224 incubated at 37°C for 10 min to solubilize RNA prior to transfer in RNase-free 96-well plates and storage  
225 at -80°C.

226

#### 227 **CHIKV RNA load quantification**

228 Two  $\mu$ L of total RNA isolated from individual mosquito saliva was used as template in one-step  
229 TaqMan RT-qPCR assay. The QuantiTect Virus kit (Qiagen) was used to prepare the reaction mix in a  
230 final volume of 30  $\mu$ L. The reaction solution consisted of 6  $\mu$ L 5X master mix, 1.5  $\mu$ L of primers (forward  
231 5'- CCCGGTAAGAGCGGTGAA-3' and reverse 5'-CTTCCGGTATGTCGATGGAGAT-3') and TaqMan  
232 probe (5'-6FAM-TGCGCCGTAGGGAACATGCC-BHQ1-3') mix at 0.4  $\mu$ M and 0.2  $\mu$ M final  
233 concentration respectively, 0.3  $\mu$ L of 100X RT mix, 20.2  $\mu$ L of RNase-free water (Gibco) and 2  $\mu$ L of  
234 template RNA. RT-qPCR reaction was conducted on a Step One Plus machine (Applied) for 20 min at  
235 50°C (RT step), 5 min at 95°C (initial denaturation) and 40 cycles with 15 s at 95°C and 45 s at 60°C.  
236 Serial dilutions of CHIKV 06.21 RNA from  $1 \times 10^8$  to  $1 \times 10^1$  copies/ $\mu$ L were used as an external standard  
237 curve to allow estimation of CHIKV RNA load in saliva samples. Each plate contained duplicates of  
238 standard samples as well as negative controls and random saliva samples without reverse transcriptase  
239 (RT-), in duplicate. Samples with a Cq value outside the linear range of the standard curve or higher  
240 than the RT- controls were excluded from the analysis. Aliquots from the same standard were used for  
241 all the plates, and samples from a single time-point were measured on the same plate to facilitate sample  
242 comparison.

243

## 244 **Statistical analysis**

245 Mosquito infection (number of CHIKV-positive mosquito bodies / number engorged  
246 mosquitoes), dissemination (number of CHIKV-positive heads / number of CHIKV-positive bodies),  
247 transmission efficiency (number of CHIKV-positive saliva / number engorged mosquitoes) and  
248 transmission rate (number of positive CHIKV-saliva / number of CHIKV-positive heads) were analysed  
249 by logistical regression and considered as binary response variables. The time (day post-exposure) and  
250 virus dose (in  $\log_{10}$  FFU/mL) were considered as continuous explanatory variables in a full factorial  
251 generalized linear model with a binomial error and a logit link function. Logistic regression assumes a  
252 saturation level of 100% and could not be used to model the relationship between the probability of  
253 transmission (response variable) and the time post infection, the dose and their interaction (predictors).  
254 We first estimated the saturation level (K) for each dose and subtracted the value  $N =$  number of  
255 mosquito with CHIKV dissemination  $\times (100\% - K)$  to the number of mosquitoes without virus in their  
256 saliva at each time post virus exposure to artificially remove mosquitoes that would never ultimately  
257 transmit the virus from the dataset. Logistic regression was then used on these transformed data to  
258 predict transmission rates across time post virus exposure and the virus oral dose (Figure S2). Statistical  
259 significance of the predictors' effects were assessed by comparing nested models using deviance  
260 analysis based on a chi-squared distribution. All the statistical analyses were performed under R  
261 environment and figures were created with the package ggplot2 within the Tidyverse environment  
262 (Wickham et al., 2019).

263

## 264 **Epidemiological modeling using Nosoi**

265 A series of stochastic agent-based model simulations were performed using the R package  
266 Nosoi as described (Lequime et al., 2020b). Briefly, transmission was considered only between infected  
267 mosquito and uninfected human, or between an infected human and an uninfected mosquito. Vertical  
268 and sexual transmission, and the impact of potential superinfection were ignored during the simulations.  
269 We assumed no particular structure within host and vector populations. It was assumed that humans do  
270 not die from infection and leave the simulation after they cure from infection (here 12 days). Mosquitoes  
271 daily probability of survival was set at 0.85, and human viremic profile followed our modelisation (Figure  
272 1). Each human agent experienced a Poisson-like distribution of bites per day with a mean value  
273 manually set at 1, 2, 3, 4, 5, 6, 7, 8, 9, 10 or 60 based on field measurement of *Aedes albopictus* blood  
274 feeding behaviour (Delatte et al., 2010).

275

276

## 277 Results

278

### 279 Estimating CHIKV viremia in human by modelisation of clinical data.

280 We aimed to provide a realistic dynamic of CHIKV viremia in human based on viral load  
281 measured in sera from human cases, despite scarce data from literature. We found two studies  
282 (Appassakij et al., 2013; Riswari et al., 2015) providing time course of human CHIKV viremia, resulting  
283 in 5 patients from which blood samples were harvested at 3 to 6 different time points prior or post  
284 symptoms onset and analysed for viral load (Figure 1A). The CHIKV load ranged from  $10^1$  to  $6.14 \times 10^8$   
285 PFU equivalent/mL with two patients displaying from  $1.1 \times 10^1$  to  $1.79 \times 10^3$  PFU equivalent/mL prior to  
286 symptoms onset. The viremia peak is reached between day 6 and 7 post-infection, corresponding to  
287 day 0 and 1 post-symptoms onset and ranges from  $1.03 \times 10^7$  to  $6.14 \times 10^8$  PFU equivalent/mL. CHIKV  
288 viremia is then rapidly decreasing, ranging at day 10-13 post-infection between  $4.3 \times 10^1$  to  $4.05 \times 10^2$   
289 PFU equivalent/mL. Of note, one patient presented a detectable CHIKV viremia up to day 19 post-  
290 infection with a viral load at  $10^1$  PFU equivalent/mL (Figure 1A). A Wood's gamma-type function was  
291 fitted to the data to provide a model describing intra-human CHIKV loads as a function of time post  
292 infection.

293

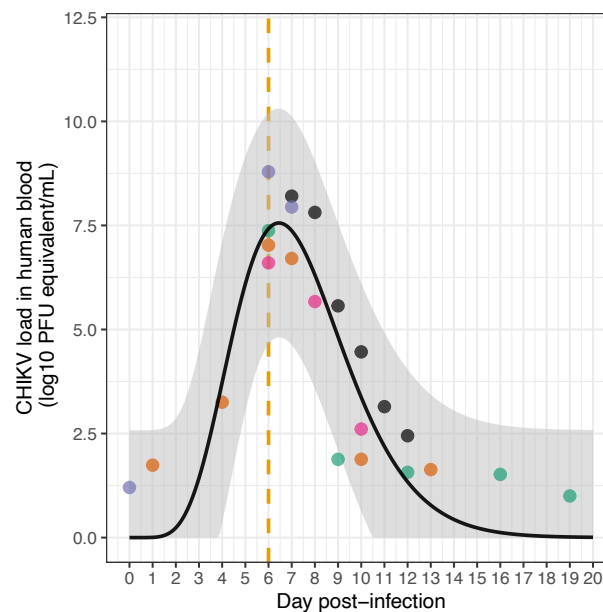

294

295 **Figure 1. Estimated time course of CHIKV load (in log<sub>10</sub> PFU equivalent/mL) in human blood as a**  
296 **function of time post infection.** A Wood's gamma-type function was used to model CHIKV viremia  
297 dynamics based on human viremia data. The black line represents model prediction using mean fit  
298 parameter values. Each dot represent a single experimental measurement, dot colors correspond to  
299 different patients ( $n=5$ ). The grey ribbon represents upper and lower predicted values.

300

### 301 *Ae. albopictus* infection rate varies upon virus dose but not time.

302 Female *Ae. albopictus* from Lyon (France) were exposed to an human erythrocytes suspension  
303 containing three doses ( $8.71 \times 10^4$ ,  $1.17 \times 10^6$  and  $4.2 \times 10^8$  FFU/mL) of CHIKV spanning the range of  
304 human viremia. Mosquito body infection rate increases with virus dose regardless of the time post-



305 exposure to CHIKV (Wald Chi-2,  $P_{\text{dose}} = 1.1 \times 10^{-6}$ ,  $P_{\text{time}} = 0.9$  and  $P_{\text{dose*time}} = 0.17$ ) (Figure 2A). As  
 306 mosquito body infection rate depends on virus dose but not on time post-exposure, we fitted a logistic  
 307 model to the data considering CHIKV blood meal titer as unique explanatory variable. A dose of  $1.12 \times 10^5$   
 308 FFU/mL is required to infect 25% of the mosquitoes corresponding to the oral infectious dose 25%  
 309 (OID<sub>25%</sub>). Mosquito body infection rate variation according to CHIKV oral dose follows a sigmoid pattern,  
 310 with an OID<sub>50%</sub> estimated at  $3.98 \times 10^5$  FFU/mL and an OID<sub>75%</sub> corresponding to  $1.41 \times 10^6$  FFU/mL.  
 311 Within a one log<sub>10</sub> variation in virus dose (from  $1 \times 10^5$  to  $1 \times 10^6$  FFU/mL), mosquito body infection rate  
 312 jumps from 25 to 75% to reach a plateau at ~100% above  $3.16 \times 10^7$  FFU/mL (Figure 2B).  
 313

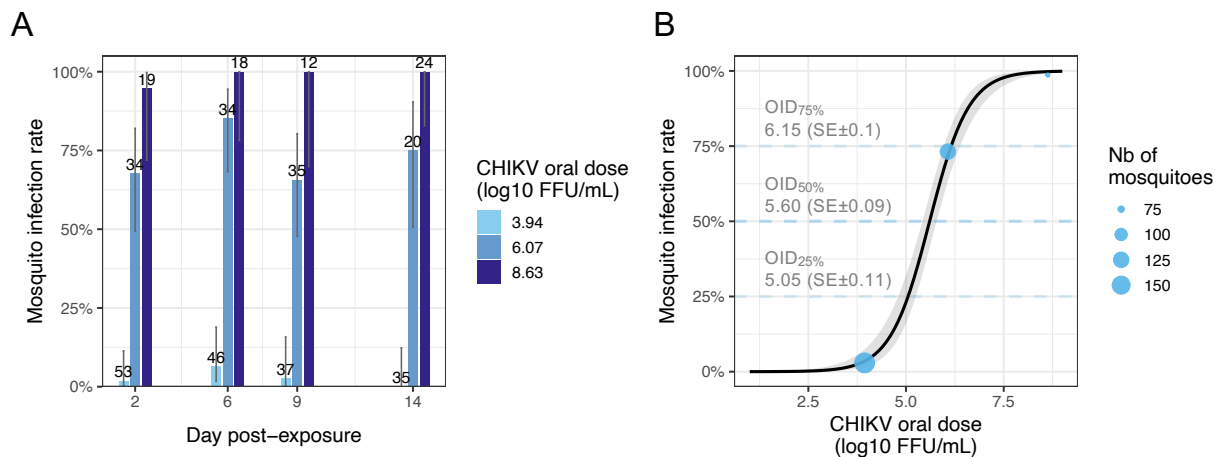

314  
 315 **Figure 2. Dose-dependent infection rate of *Ae. albopictus* mosquitoes exposed to CHIKV 06.21.**  
 316 (A) Proportion (in %) of *Ae. albopictus* female bodies positive for CHIKV infection (as determined by  
 317 detection of infectious particles) at four days post-exposure (2, 6, 9 and 14) to three virus doses ( $8.71 \times 10^4$ ,  
 318  $1.17 \times 10^6$  and  $4.2 \times 10^8$  FFU/mL) in the blood meal. The number of individual females analysed at  
 319 each time point is indicated, with the 95% confidence interval associated. (B) Mosquito infection rate  
 320 response to CHIKV dose in the blood meal. Blue dots correspond to the observed infection rate upon  
 321 each of the three CHIKV oral dose tested. Dot size is proportional to the number of mosquitoes tested.  
 322 The black line was obtained by fitting a logistic model to the data. The grey ribbon indicates the 95%  
 323 confidence intervals. The oral infectious dose (OID) to infect 25%, 50% and 75% of the mosquitoes  
 324 exposed to CHIKV is indicated (in log<sub>10</sub> FFU/mL) with the associated standard error.

325  
 326 **Virus dose and time dependence of *Ae. albopictus* dissemination dynamics.**

327 The proportion of CHIKV positive heads among positive bodies (*i.e.* mosquito dissemination  
 328 rate) was analysed using virus dose, time post-exposure and their interaction as explanatory variables.  
 329 Both time and virus dose impact dissemination rate although not in interaction (Wald Chi-2,  $P_{\text{dose}} = 8.29$   
 330  $\times 10^{-6}$ ,  $P_{\text{time}} = 1.75 \times 10^{-6}$  and  $P_{\text{dose*time}} = 0.83$ ) (Figure 3A). Data showed that 100% dissemination was  
 331 reached at dose  $8.71 \times 10^4$  ( $n=1/1$ ) and dose  $4.2 \times 10^8$  ( $n=18/18$ ) FFU/mL whereas 95.6% dissemination  
 332 was reached at dose  $1.17 \times 10^6$  FFU/mL ( $n=22/23$ ). For the two highest virus doses, high dissemination  
 333 values were measured as soon as day 6 (93.1% at dose  $1.17 \times 10^6$  FFU/mL and 100% at dose  $4.2 \times 10^8$   
 334  $\times 10^8$  FFU/mL) whereas the maximum dissemination rate (100%) for dose  $8.71 \times 10^4$  FFU/mL was  
 335 obtained at day 9 post-exposure to CHIKV (Figure 3A). The estimated time to reach 50% dissemination

336 in *Ae. albopictus* females exposed to CHIKV was 7.5 days, 2.2 days and below 1 day for  $8.71 \times 10^4$ ,  
337  $1.17 \times 10^6$  and  $4.2 \times 10^8$  FFU/mL CHIKV doses in the blood meal, respectively. Dissemination dynamics  
338 within the mosquito vector was inferred from experimental data for a range of CHIKV oral dose from 1  
339  $\times 10^3$  to  $1 \times 10^8$  FFU/mL (Figure 3B). Interestingly, all the CHIKV doses tested led to 100% dissemination  
340 within the time range used for predictions (up to 40 days) although it requires a longer time for the lowest  
341 virus doses tested. These data indicates that if a dissemination barrier exists in *Ae. albopictus* against  
342 CHIKV, it only slow down the dissemination process without preventing all infected mosquitoes to  
343 develop a disseminated infection.  
344

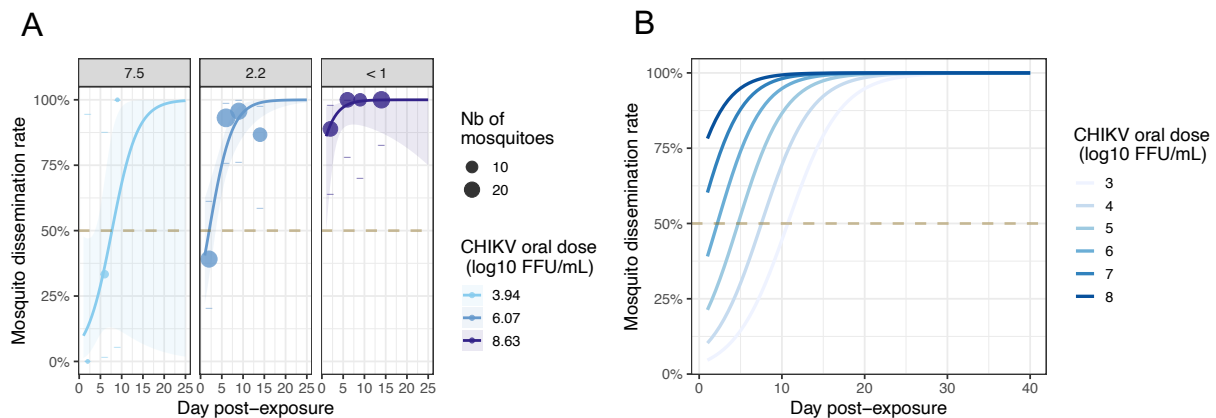

345  
346 **Figure 3. Dose-dependent dissemination rate of *Ae. albopictus* mosquitoes exposed to CHIKV**  
347 **06.21. (A)** Mosquito dissemination dynamics. Each dot corresponds to the proportion (in %) of *Ae.*  
348 *albopictus* female heads positive for CHIKV infection (as determined by detection of infectious particles)  
349 at four time points (2, 6, 9 and 14 days post-exposure) to three virus doses ( $8.71 \times 10^4$ ,  $1.17 \times 10^6$  and  
350  $4.2 \times 10^8$  FFU/mL) in the blood meal. No disseminated females could be detected at day 14 post-  
351 exposure at the lowest CHIKV oral dose ( $8.71 \times 10^4$  FFU/mL). Dots size is proportional to the number  
352 of mosquitoes tested. Logistic regression was used to model the time-dependent effect of the virus dose  
353 on mosquito dissemination rate. Lines correspond to fit values with their 95% confidence intervals  
354 displayed as ribbons. The time needed to reach 50% dissemination is 7.5, 2.2 and <1 day for the  $8.71$   
355  $\times 10^4$ ,  $1.17 \times 10^6$  and  $4.2 \times 10^8$  FFU/mL CHIKV oral dose, respectively as indicated within each facet  
356 label. **(B)** Predicted dissemination dynamics according to virus dose and time post-exposure for a range  
357 of CHIKV blood meal titres ( $1 \times 10^3$  to  $1 \times 10^8$  FFU/mL).

358  
359 **Time post-exposure impacts CHIKV transmission pattern and saliva viral load.**

360 In the light of previous data, we inferred mosquito transmission dynamics upon various CHIKV  
361 oral dose. To that aim, we monitored, at fine time scale, the presence of infectious CHIKV particles in  
362 individual mosquito saliva collected by forced salivation technique. This allowed us to measure the  
363 dynamics of virus transmission, estimate extrinsic incubation period (EIP) and monitor individual viral  
364 load in saliva. Within this experimental design, only two viral doses were tested arbitrarily designed  
365 intermediate ( $4.8 \times 10^5$  FFU/mL) and high ( $1.14 \times 10^8$  FFU/mL) to allow the collection of individual  
366 mosquitoes head and saliva at eleven time points (day 2, 3, 4, 5, 6, 7, 10, 12, 14, 17 and 20 post-  
367 exposure) that spanned the major part of mosquito expected lifespan. The proportion of CHIKV-positive

368 saliva among positive bodies (*i.e.* transmission rate) was analysed using virus dose, time post-exposure  
369 and their interaction as explanatory variables. Only time impacts transmission rate (Wald Chi-2,  $P_{\text{time}} =$   
370 0.0037,  $P_{\text{dose}} = 0.18$ , and  $P_{\text{dose*time}} = 0.8$ ) (Figure 4A). Infectious saliva samples were detected as soon  
371 as day 2 post-exposure to CHIKV, with 33% transmission rate at dose  $4.8 \times 10^5$  FFU/mL ( $n=1/3$ ) and  
372 14% at dose  $1.14 \times 10^8$  FFU/mL ( $n=2/14$ ). From day 2 post-exposure, the transmission rate tends to  
373 increase following a sigmoid shape, reaching a plateau around 60% for both doses ( $4.8 \times 10^5$  and  $1.14$   
374  $\times 10^8$  FFU/mL) (Figure 4A). The time needed to reach 50% infectious mosquitoes, *i.e.* Extrinsic  
375 Incubation Period 50% (EIP<sub>50</sub>) was 7.5 and 3.5 days for dose  $4.8 \times 10^5$  and  $1.14 \times 10^8$  FFU/mL,  
376 respectively. The proportion of mosquitoes that would never ultimately transmit the virus were artificially  
377 removed from the dataset based on predicted saturation level at each dose (*i.e.* 40% of mosquitoes  
378 without virus in their saliva were removed at each time post infection) to ensure a saturation level of  
379 100%, a prerequisite to apply logistic regression analysis on these data. Logistic regression was used  
380 on transformed data to predict transmission rates across a range of oral virus doses and times post  
381 virus infection. Supplementary figure S2 describes the cumulative proportion of mosquitoes with a  
382 systemic infection reaching infectiousness (*i.e.* EIP) over time post infection for a given dose (Figure  
383 S2).

384 We questioned if the amount of CHIKV in the saliva could be associated with the oral dose  
385 mosquitoes were challenged with. Total RNA was isolated from individual saliva samples, for the  $4.8 \times$   
386  $10^5$  and  $1.14 \times 10^8$  FFU/mL doses at each time point, then CHIKV RNA load was measured by TaqMan  
387 RT-qPCR assay and analysed according to virus dose and time post-exposure (Figure 4B). Only the  
388 time post-exposure had a significant effect indicating an overall decrease of viral load in mosquito saliva  
389 over time regardless of the initial dose of exposure despite important inter-individual variations (Anova,  
390  $P_{\text{time}} = 0.006$ ,  $P_{\text{dose}} = 0.66$  and  $P_{\text{dose*time}} = 0.94$ ). Of note, when analysing all the saliva positive for CHIKV  
391 RNA including samples with no detectable infectious virus, analysis showed that CHIKV RNA load  
392 depends both on time post-exposure and, to a lesser extent, virus dose (Anova,  $P_{\text{time}} = 0.047$ ,  $P_{\text{dose}} =$   
393 0.01 and  $P_{\text{dose*time}} = 0.77$ ) (Figure S3).

394

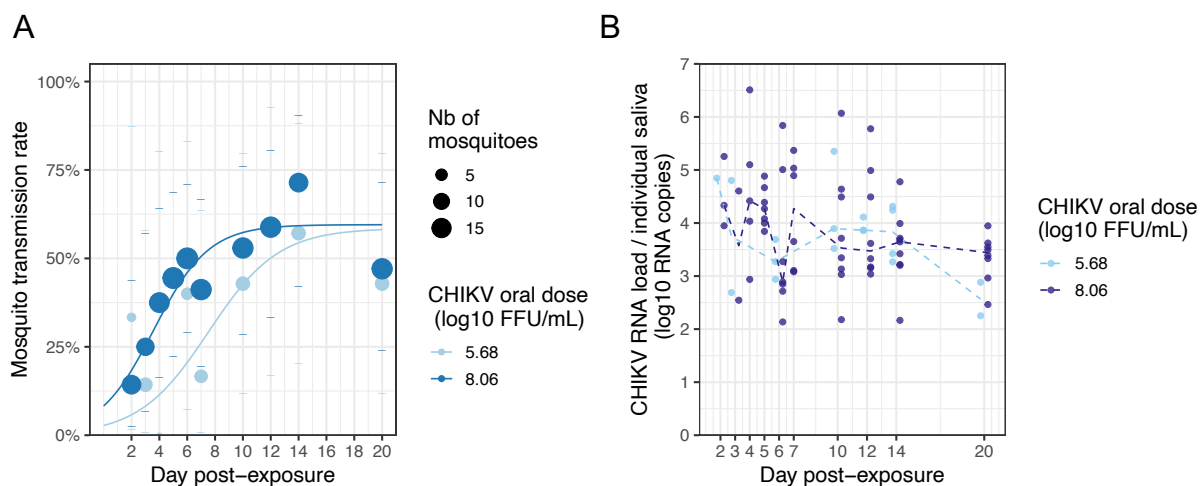

395

396 **Figure 4. Transmission dynamics of CHIKV 06.21 by *Ae. albopictus*.** (A) Mosquito transmission  
397 dynamics. Each dot corresponds to the proportion (in %) of *Ae. albopictus* female saliva positive for

398 CHIKV infection (as determined by detection of infectious particles) at ten time points (2, 3, 4, 5, 6, 7,  
399 10, 12, 14, and 20 days post-exposure) for two virus doses ( $4.8 \times 10^5$  and  $1.14 \times 10^8$  FFU/mL) in the  
400 blood meal. Dots size is proportional to the number of saliva tested. (B) The CHIKV RNA load of each  
401 individual saliva scored positive for infectious CHIKV was measured by TaqMan RT-qPCR assay using  
402 a synthetic RNA as standard then expressed in  $\log_{10}$  RNA copies/saliva. Each dot within represents a  
403 saliva sample from an individual mosquito exposed to the indicated CHIKV oral dose (in  $\log_{10}$  FFU/mL).

404

#### 405 **Simulation of CHIKV epidemic upon dose-dependent intra-vector dynamics**

406 A stochastic agent-based model (ABM) was used to assess the epidemiological impact of within-  
407 host CHIKV dynamics using the R package Nosoi, as done previously for ZIKV (Lequime et al., 2020b).  
408 Starting with one infected human in a population of susceptible humans and mosquitoes, the model  
409 simulates CHIKV transmissions according to human viremia and the associated probability of mosquito  
410 infection and virus transmission timeliness (EIP). The model was run 100 independent times over 365  
411 days for a range of eleven mean individual mosquito biting rates (1, 2, 3, 4, 5, 6, 7, 8, 9, 10 and 60  
412 independent mosquitoes biting per person per day). Simulations led to a high proportion of sustainable  
413 epidemics (>100 secondary infections) even under a low mosquito biting rate (Figure 5).

414

415

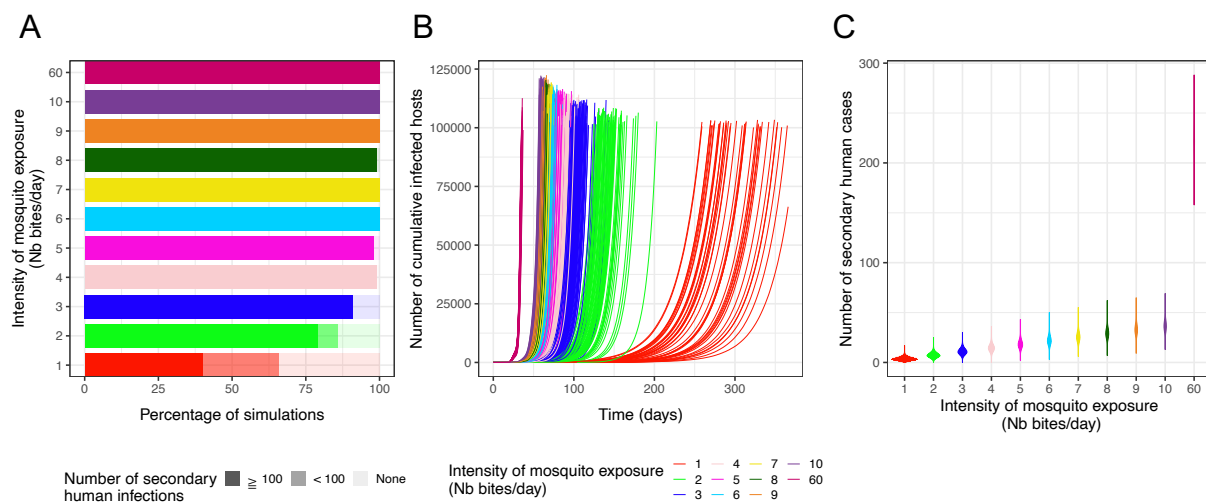

416

417

#### 418 **Figure 5. Influence of dose-dependent intra-mosquito CHIKV dynamics on outbreak simulations**

419 **with various levels of mosquito bites.** Stochastic agent-based epidemiological simulations  
420 considering within-host infection dynamics on transmission probability during mosquito-human  
421 infectious contacts were performed in 100 independent replicates. A total of 11 mosquito bite intensity  
422 levels were tested: 1, 2, 3, 4, 5, 6, 7, 8, 9, 10 and 60 bites per human per day. (A) Stacked proportions  
423 of outbreaks resulting in no secondary infected human host, infected human hosts < 100 and infected  
424 human hosts  $\geq 100$ . (B) Cumulative number of infected humans over time. Each curve represents a  
425 simulation run. (C) Violin plots showing the number of secondary cases values densities for each  
426 intensity of mosquito exposure.

427

## 428 Discussion

429  
430 Our work uncovers the intra-vector dynamics of CHIKV in *Ae. albopictus* upon a range of virus  
431 doses that are representative of human CHIKV viraemia. Few data are available on the time course of  
432 viraemia in individual humans, this parameter being rather determined at a few discrete time-points and  
433 often in pooled blood samples. Available studies suggest that human viremia is short (up to 12 days)  
434 with viral load ranging from  $10^3$  to  $10^{10}$  RNA copies / mL, or  $10^4$  to  $10^7$  as expressed in PFU/mL (Lanciotti  
435 et al., 2007; Laurent et al., 2007; Panning et al., 2008). Our modelisation of human viraemia in blood,  
436 although based on limited studies, match these data and also shows a similar pattern to non-human  
437 primates in which CHIKV 06.21 viremia last up to 5-7 days post-exposure, with detectable viral RNA at  
438 soon as day 1. The CHIKV 06.21 load in the macaques blood ranges between  $10^4$  to  $10^9$  viral RNA  
439 copies / mL with a peak at day 2 post-exposure (Labadie et al., 2010; Messaoudi et al., 2013). However,  
440 our CHIKV viremia modelisation in human blood post infection is not representing the average viremia  
441 load post infection in human and is just provided as an example to help the interpretation of CHIKV  
442 vector competence data. More individual viremia data, expressed as infectious particles per mL, would  
443 be needed to assess an accurate intra human viremia.

444 Dose-response experiments in mosquitoes confirmed that CHIKV infection initiation in mosquito  
445 midgut directly depends on the initial number of viral particles in the blood meal, independently of the  
446 time as shown for ZIKV (Lequime et al., 2020b). Interestingly, despite very close infectious dose for 50%  
447 of the mosquitoes ( $OID_{50\%}$ ) i.e. 5.6 log<sub>10</sub> FFU/mL for CHIKV and 5.62 log<sub>10</sub> FFU/mL for ZIKV, CHIKV  
448 dissemination is more explosive compare to ZIKV (Lequime et al., 2020b). Study of CHIK from Asian  
449 lineage in *Ae. aegypti* suggested that viral replication kinetics in the midgut, in link with 3'UTR viral  
450 region supports viral dissemination rather than viral load (Merwaiss et al., 2020). In our study, we found  
451 that even at the lowest oral dose, that corresponds to a medium-low value in human viraemia, all the  
452 individuals presented a disseminated infection. This underscores that the dissemination potential is a  
453 key feature for arboviruses that should be carefully characterized. Indeed, this suggest that even a few  
454 mosquitoes exposed to low viraemia CHIKV humans will become infected they will transmit the virus.  
455 Transmission is usually used as a proxy of viral transmission potential while ignoring the salivary gland  
456 infection and escape barrier. To our knowledge, our study is the first to analyse transmission dynamics  
457 by scoring individual saliva samples from day 2 to day 20. We found that the saliva barrier was low as  
458 ~50% of the mosquitoes were found with at least one viral particle in the saliva from day 6 to day 20  
459 post CHIKV exposure. We also highlighted that transmission was quick, as we detected positive  
460 mosquito saliva as soon as day 2 post-exposure (~12%) as previously reported (Dubrulle et al., 2009)  
461 although no mosquitoes was collected on the day after virus exposure. A recent study on longitudinal  
462 CHIKV expectoration in saliva by *Ae. aegypti* using non-sacrificial method showed an on/off presence  
463 of virus in saliva underlying questioning viral persistence in mosquito tissues (Mayton et al., 2021). We  
464 uncovered that virus load in individual mosquitoes depends on both time post-exposure and viral dose.  
465 It suggests that elder mosquitoes transmitted overall a lower dose, and that the virus dose in the blood  
466 meal could influence a global mosquito "infection state" that impacts transmission.

## 467 468 Acknowledgments



469 This project was funded by IDEX Lyon scientific breakthrough project, Micro-Be-Have. We thank all the  
470 members from the Micro-Be-Have consortium for insightful discussions. We also thank Dr. Carine  
471 Maise-Paradisi from IVPC unit for the kind gift of anti-SVF antibody. We thank Anna-Bella Failloux and  
472 Patrick Mavingui for providing the CHIKV 06.21 isolate. Thanks to the managers of the AniRa biosafety  
473 level 3 platform under the supervision of SFR biosciences.  
474

475 **References**

476  
477

- 478 Appassakij H, Khuntikij P, Kemapunmanus M, Wutthanasungsan R, Silpapojakul K. 2013. Viremic profiles in  
479 chikv-infected cases. *Transfusion* 53:2567–2574. DOI: 10.1111/j.1537-2995.2012.03960.x.
- 480 Aranda C, Martínez MJ, Montalvo T, Eritja R, Navero-Castillejos J, Herreros E, Marqués E, Escosa R, Corbella  
481 I, Bigas E, Picart L, Jané M, Barrabeig I, Torner N, Talavera S, Vázquez A, Sánchez-Seco MP, Busquets N.  
482 2018. Arbovirus surveillance: first dengue virus detection in local *Aedes albopictus* mosquitoes in Europe,  
483 Catalonia, Spain, 2015. *Eurosurveillance* 23:1700837. DOI: 10.2807/1560-7917.es.2018.23.47.1700837.
- 484 Armstrong PM, Ehrlich HY, Magalhaes T, Miller MR, Conway PJ, Bransfield A, Misencik MJ, Gloria-Soria A,  
485 Warren JL, Andreadis TG, Shepard JJ, Foy BD, Pitzer VE, Brackney DE. 2019. Successive blood meals  
486 enhance virus dissemination within mosquitoes and increase transmission potential. *Nature microbiology*:1–  
487 9. DOI: 10.1038/s41564-019-0619-y.
- 488 Bhatt S, Gething PW, Brady OJ, Messina JP, Farlow AW, Moyes CL, Drake JM, Brownstein JS, Hoen AG,  
489 Sankoh O, Myers MF, George DB, Jaenisch T, Wint GRW, Simmons CP, Scott TW, Farrar JJ, Hay SI. 2013.  
490 The global distribution and burden of dengue. *Nature* 496:504–507. DOI: 10.1038/nature12060.
- 491 Calba C, Guerbois-Galla M, Franke F, Jeannin C, Auzet-Caillaud M, Grard G, Pigaglio L, Decoppet A,  
492 Weicherding J, Savail M-C, Munoz-Riviero M, Chaud P, Cadiou B, Ramalli L, Fournier P, Noël H,  
493 Lamballerie XD, Paty M-C, Leparac-Goffart I. 2017. Preliminary report of an autochthonous chikungunya  
494 outbreak in France, July to September 2017. *Eurosurveillance* 22:17–00647. DOI: 10.2807/1560-  
495 7917.es.2017.22.39.17-00647.
- 496 Christofferson RC, Chisenhall DM, Wearing HJ, Mores CN. 2014. Chikungunya Viral Fitness Measures within  
497 the Vector and Subsequent Transmission Potential. *PLoS ONE* 9:e110538. DOI:  
498 10.1371/journal.pone.0110538.
- 499 Christofferson RC, Mores CN. 2011. Estimating the Magnitude and Direction of Altered Arbovirus  
500 Transmission Due to Viral Phenotype. *PLoS ONE* 6:e16298. DOI: 10.1371/journal.pone.0016298.
- 501 Delatte H, Desvars A, Bouétard A, Bord S, Gimonneau G, Vourc'h G, Fontenille D. 2010. Blood-Feeding  
502 Behavior of *Aedes albopictus*, a Vector of Chikungunya on La Réunion. *Vector-Borne and Zoonotic*  
503 *Diseases* 10:249–258. DOI: 10.1089/vbz.2009.0026.
- 504 Delisle E, Rousseau C, Broche B, Leparac-Goffart I, L'Ambert G, Cochet A, Prat C, Foulongne V, Ferré JB,  
505 Catelinois O, Flusin O, Tchernonog E, Moussion IE, Wiegandt A, Septfons A, Mendy A, Moyano MB,  
506 Laporte L, Maurel J, Jourdain F, Reynes J, Paty MC, Golliot F. 2015. Chikungunya outbreak in Montpellier,  
507 France, September to October 2014. *Eurosurveillance* 20. DOI: 10.2807/1560-7917.es2015.20.17.21108.
- 508 Dubrulle M, Mousson L, Moutailler S, Vazeille M, Failloux A-B. 2009. Chikungunya virus and *Aedes*  
509 mosquitoes: saliva is infectious as soon as two days after oral infection. *PloS One* 4:e5895. DOI:  
510 10.1371/journal.pone.0005895.
- 511 Fikrig K, Harrington LC. 2021. Understanding and interpreting mosquito blood feeding studies: the case of  
512 *Aedes albopictus*. *Trends in Parasitology* 37:959–975. DOI: 10.1016/j.pt.2021.07.013.
- 513 Gratz NG. 2004. Critical review of the vector status of *Aedes albopictus*. *Medical and Veterinary Entomology*  
514 18:215–227. DOI: 10.1111/j.0269-283x.2004.00513.x.
- 515 Grubaugh ND, Ladner JT, Lemey P, Pybus OG, Rambaut A, Holmes EC, Andersen KG. 2019. Tracking virus  
516 outbreaks in the twenty-first century. *Nature Microbiology* 4:10–19. DOI: 10.1038/s41564-018-0296-2.

- 517 Gubler DJ. 2011. Dengue, Urbanization and Globalization: The Unholy Trinity of the 21st Century. *Tropical*  
518 *Medicine and Health* 39:S3–S11. DOI: 10.2149/tmh.2011-s05.
- 519 Heitmann A, Jansen S, Lühken R, Leggewie M, Schmidt-Chanasit J, Tannich E. 2018. Forced Salivation As a  
520 Method to Analyze Vector Competence of Mosquitoes. *Journal of Visualized Experiments : JoVE*:57980.  
521 DOI: 10.3791/57980.
- 522 Hurk AF van den, Hall-Mendelin S, Pyke AT, Smith GA, Mackenzie JS. 2010. Vector Competence of  
523 Australian Mosquitoes for Chikungunya Virus. *Vector-Borne and Zoonotic Diseases* 10:489–495. DOI:  
524 10.1089/vbz.2009.0106.
- 525 Islam ZU, Bishop SC, Savill NJ, Rowland RRR, Lunney JK, Tribble B, Doeschl-Wilson AB. 2013. Quantitative  
526 Analysis of Porcine Reproductive and Respiratory Syndrome (PRRS) Viremia Profiles from Experimental  
527 Infection: A Statistical Modelling Approach. *PLoS ONE* 8:e83567. DOI: 10.1371/journal.pone.0083567.
- 528 Kraemer MUG, Reiner RC, Brady OJ, Messina JP, Gilbert M, Pigott DM, Yi D, Johnson K, Earl L, Marczak  
529 LB, Shirude S, Weaver ND, Bisanzio D, Perkins TA, Lai S, Lu X, Jones P, Coelho GE, Carvalho RG, Bortel  
530 WV, Marsboom C, Hendrickx G, Schaffner F, Moore CG, Nax HH, Bengtsson L, Wetter E, Tatem AJ,  
531 Brownstein JS, Smith DL, Lambrechts L, Cauchemez S, Linard C, Faria NR, Pybus OG, Scott TW, Liu Q,  
532 Yu H, Wint GRW, Hay SI, Golding N. 2019. Past and future spread of the arbovirus vectors *Aedes aegypti*  
533 and *Aedes albopictus*. *Nature Microbiology* 4:854–863. DOI: 10.1038/s41564-019-0376-y.
- 534 Labadie K, Larcher T, Joubert C, Mannioui A, Delache B, Brochard P, Guigand L, Dubreil L, Lebon P, Verrier  
535 B, Lamballerie X de, Suhrbier A, Cherel Y, Grand RL, Roques P. 2010. Chikungunya disease in nonhuman  
536 primates involves long-term viral persistence in macrophages. *Journal of Clinical Investigation* 120:894–  
537 906. DOI: 10.1172/jci40104.
- 538 Labeaud AD, Bashir F, King CH. 2011. Measuring the burden of arboviral diseases: the spectrum of morbidity  
539 and mortality from four prevalent infections. *Population Health Metrics* 9:1. DOI: 10.1186/1478-7954-9-1.
- 540 Lambrechts L. 2011. Quantitative genetics of *Aedes aegypti* vector competence for dengue viruses: towards a  
541 new paradigm? *Trends in Parasitology* 27:111–114. DOI: 10.1016/j.pt.2010.12.001.
- 542 Lanciotti RS, Kosoy OL, Laven JJ, Panella AJ, Velez JO, Lambert AJ, Campbell GL. 2007. Chikungunya virus  
543 in US travelers returning from India, 2006. *Emerging Infectious Diseases* 13:764–767. DOI:  
544 10.3201/eid1305.070015.
- 545 Laurent P, Roux KL, Grivard P, Bertil G, Naze F, Picard M, Staikowsky F, Barau G, Schuffenecker I, Michault  
546 A. 2007. Development of a sensitive real-time reverse transcriptase PCR assay with an internal control to  
547 detect and quantify chikungunya virus. *Clinical Chemistry* 53:1408–1414. DOI:  
548 10.1373/clinchem.2007.086595.
- 549 Lequime S, Bastide P, Dellicour S, Lemey P, Baele G. 2020a. nosoi: A stochastic agent-based transmission  
550 chain simulation framework in r. *Methods in Ecology and Evolution* 11:1002–1007. DOI: 10.1111/2041-  
551 210x.13422.
- 552 Lequime S, Dehecq J-S, Matheus S, Laval F de, Almeras L, Briolant S, Fontaine A. 2020b. Modeling intra-  
553 mosquito dynamics of Zika virus and its dose-dependence confirms the low epidemic potential of *Aedes*  
554 *albopictus*. *PLOS Pathogens* 16:e1009068. DOI: 10.1371/journal.ppat.1009068.
- 555 Mayton EH, Hernandez HM, Vitek CJ, Christofferson RC. 2021. A Method for Repeated, Longitudinal  
556 Sampling of Individual *Aedes aegypti* for Transmission Potential of Arboviruses. *Insects* 12:292. DOI:  
557 10.3390/insects12040292.
- 558 Merwaiss F, Filomatori CV, Susuki Y, Bardossy ES, Alvarez DE, Saleh M-C. 2020. “Chikungunya virus  
559 replication rate determines the capacity of crossing tissue barriers in mosquitoes.” *Journal of Virology* 95.  
560 DOI: 10.1128/jvi.01956-20.

- 561 Messaoudi I, Vomaske J, Totonchy T, Kreklywich CN, Haberthur K, Springgay L, Brien JD, Diamond MS,  
562 DeFilippis VR, Streblow DN. 2013. Chikungunya Virus Infection Results in Higher and Persistent Viral  
563 Replication in Aged Rhesus Macaques Due to Defects in Anti-Viral Immunity. *PLoS Neglected Tropical*  
564 *Diseases* 7:e2343. DOI: 10.1371/journal.pntd.0002343.
- 565 Moloney RM, Kmush B, Rudolph KE, Cummings DAT, Lessler J. 2014. Incubation Periods of Mosquito-Borne  
566 Viral Infections: A Systematic Review. *The American Journal of Tropical Medicine and Hygiene* 90:882–  
567 891. DOI: 10.4269/ajtmh.13-0403.
- 568 Nguyet MN, Duong THK, Trung VT, Nguyen THQ, Tran CNB, Long VT, Dui LT, Nguyen HL, Farrar JJ,  
569 Holmes EC, Rabaa MA, Bryant JE, Nguyen TT, Nguyen HTC, Nguyen LTH, Pham MP, Nguyen HT, Luong  
570 TTH, Wills B, Nguyen CVV, Wolbers M, Simmons CP. 2013. Host and viral features of human dengue  
571 cases shape the population of infected and infectious *Aedes aegypti* mosquitoes. *Proceedings of the National*  
572 *Academy of Sciences of the United States of America* 110:9072–9077. DOI: 10.1073/pnas.1303395110.
- 573 Panning M, Grywna K, Esbroeck M van, Emmerich P, Drosten C. 2008. Chikungunya fever in travelers  
574 returning to Europe from the Indian Ocean region, 2006. *Emerging Infectious Diseases* 14:416–422. DOI:  
575 10.3201/eid1403.070906.
- 576 Paupy C, Delatte H, Bagny L, Corbel V, Fontenille D. 2009. *Aedes albopictus*, an arbovirus vector: from the  
577 darkness to the light. *Microbes and Infection / Institut Pasteur* 11:1177–1185. DOI:  
578 10.1016/j.micinf.2009.05.005.
- 579 Raquin V, Merklings SH, Gausson V, Moltini-Conclois I, Frangeul L, Varet H, Dillies M-A, Saleh M-C,  
580 Lambrechts L. 2017. Individual co-variation between viral RNA load and gene expression reveals novel host  
581 factors during early dengue virus infection of the *Aedes aegypti* midgut. *PLoS Neglected Tropical Diseases*  
582 11:e0006152. DOI: 10.1371/journal.pntd.0006152.
- 583 Raquin V, Moro CV, Saucereau Y, Tran F-H, Potier P, Mavingui P. 2015. Native *Wolbachia* from *Aedes*  
584 *albopictus* Blocks Chikungunya Virus Infection In Cellulo. *PLOS ONE* 10:e0125066. DOI:  
585 10.1371/journal.pone.0125066.
- 586 Rezza G, Nicoletti L, Angelini R, Romi R, Finarelli A, Panning M, Cordioli P, Fortuna C, Boros S, Magurano F,  
587 Silvi G, Angelini P, Dottori M, Ciufolini M, Majori G, Cassone A, group for the C study. 2007. Infection  
588 with chikungunya virus in Italy: an outbreak in a temperate region. *The Lancet* 370:1840–1846. DOI:  
589 10.1016/s0140-6736(07)61779-6.
- 590 Riswari SF, Ma'roef CN, Djauhari H, Kosasih H, Perkasa A, Yudhaputri FA, Artika IM, Williams M, Ven A  
591 van der, Myint KS, Alisjahbana B, Ledermann JP, Powers AM, Jaya UA. 2015. Study of viremic profile in  
592 febrile specimens of chikungunya in Bandung, Indonesia. *Journal of clinical virology : the official*  
593 *publication of the Pan American Society for Clinical Virology* 74:61–5. DOI: 10.1016/j.jcv.2015.11.017.
- 594 Sanchez-Vargas I, Harrington LC, Black WC, Olson KE. 2019. Analysis of Salivary Glands and Saliva from  
595 *Aedes albopictus* and *Aedes aegypti* Infected with Chikungunya Viruses. *Insects* 10:39. DOI:  
596 10.3390/insects10020039.
- 597 Schuffenecker I, Iteman I, Michault A, Murri S, Frangeul L, Vaney M-C, Lavenir R, Pardigon N, Reynes J-M,  
598 Pettinelli F, Biscornet L, Diancourt L, Michel S, Duquerroy S, Guigon G, Frenkiel M-P, Bréhin A-C, Cubito  
599 N, Després P, Kunst F, Rey FA, Zeller H, Brisse S. 2006. Genome Microevolution of Chikungunya Viruses  
600 Causing the Indian Ocean Outbreak. *PLoS Medicine* 3:e263. DOI: 10.1371/journal.pmed.0030263.
- 601 Sherpa S, Blum MGB, Capblancq T, Cumer T, Rioux D, Després L. 2019. Unravelling the invasion history of  
602 the Asian tiger mosquito in Europe. *Molecular Ecology* 28:2360–2377. DOI: 10.1111/mec.15071.
- 603 Smith DL, Battle KE, Hay SI, Barker CM, Scott TW, McKenzie FE. 2012. Ross, Macdonald, and a Theory for  
604 the Dynamics and Control of Mosquito-Transmitted Pathogens. *PLoS Pathogens* 8:e1002588. DOI:  
605 10.1371/journal.ppat.1002588.

- 606 Succo T, Leparc-Goffart I, Ferré J-B, Roiz D, Broche B, Maquart M, Noel H, Catelinois O, Entezam F, Caire D,  
607 Jourdain F, Esteve-Moussion I, Cochet A, Paupy C, Rousseau C, Paty M-C, Golliot F. 2016. Autochthonous  
608 dengue outbreak in Nîmes, South of France, July to September 2015. *Eurosurveillance* 21. DOI:  
609 10.2807/1560-7917.es.2016.21.21.30240.
- 610 Tsetsarkin KA, Vanlandingham DL, McGee CE, Higgs S. 2007. A single mutation in chikungunya virus affects  
611 vector specificity and epidemic potential. *PLoS pathogens* 3:e201. DOI: 10.1371/journal.ppat.0030201.
- 612 Vazeille M, Moutailler S, Coudrier D, Rousseaux C, Khun H, Huerre M, Thiria J, Dehecq J-S, Fontenille D,  
613 Schuffenecker I, Despres P, Failloux A-B. 2007. Two Chikungunya Isolates from the Outbreak of La  
614 Reunion (Indian Ocean) Exhibit Different Patterns of Infection in the Mosquito, *Aedes albopictus*. *PLoS*  
615 *ONE* 2:e1168. DOI: 10.1371/journal.pone.0001168.
- 616 Vega-Rua A, Zouache K, Caro V, Diancourt L, Delaunay P, Grandadam M, Failloux A-B. 2013. High  
617 Efficiency of Temperate *Aedes albopictus* to Transmit Chikungunya and Dengue Viruses in the Southeast of  
618 France. *PLoS ONE* 8:e59716. DOI: 10.1371/journal.pone.0059716.
- 619 Vega-Rua A, Zouache K, Girod R, Failloux A-B, Lourenco-de-Oliveira R. 2014. High Level of Vector  
620 Competence of *Aedes aegypti* and *Aedes albopictus* from Ten American Countries as a Crucial Factor in the  
621 Spread of Chikungunya Virus. *Journal of Virology* 88:6294–6306. DOI: 10.1128/jvi.00370-14.
- 622 Venturi G, Luca MD, Fortuna C, Remoli ME, Riccardo F, Severini F, Toma L, Manso MD, Benedetti E,  
623 Caporali MG, Amendola A, Fiorentini C, Liberato CD, Giammattei R, Romi R, Pezzotti P, Rezza G, Rizzo  
624 C. 2017. Detection of a chikungunya outbreak in Central Italy, August to September 2017. *Eurosurveillance*  
625 22:17–00646. DOI: 10.2807/1560-7917.es.2017.22.39.17-00646.
- 626 Viglietta M, Bellone R, Blisnick AA, Failloux A-B. 2021. Vector Specificity of Arbovirus Transmission.  
627 *Frontiers in Microbiology* 12:773211. DOI: 10.3389/fmicb.2021.773211.
- 628 Wickham H, Averick M, Bryan J, Chang W, McGowan L, François R, Golemund G, Hayes A, Henry L, Hester  
629 J, Kuhn M, Pedersen T, Miller E, Bache S, Müller K, Ooms J, Robinson D, Seidel D, Spinu V, Takahashi K,  
630 Vaughan D, Wilke C, Woo K, Yutani H. 2019. Welcome to the Tidyverse. *Journal of Open Source Software*  
631 4:1686. DOI: 10.21105/joss.01686.
- 632 Zouache K, Fontaine A, Vega-Rua A, Mousson L, Thiberge J-M, Lourenco-De-Oliveira R, Caro V, Lambrechts  
633 L, Failloux A-B. 2014. Three-way interactions between mosquito population, viral strain and temperature  
634 underlying chikungunya virus transmission potential. *Proceedings of the Royal Society B: Biological*  
635 *Sciences* 281:20141078. DOI: 10.1098/rspb.2014.1078.
- 636
